# Supplementary material
Source: PubMed Central journal article supplement (PMC7462630)
Supplement: NIHMS1617789-supplement-Supplemental_figure_1.pdf [file NIHMS1617789-supplement-Supplemental_figure_1.pdf]

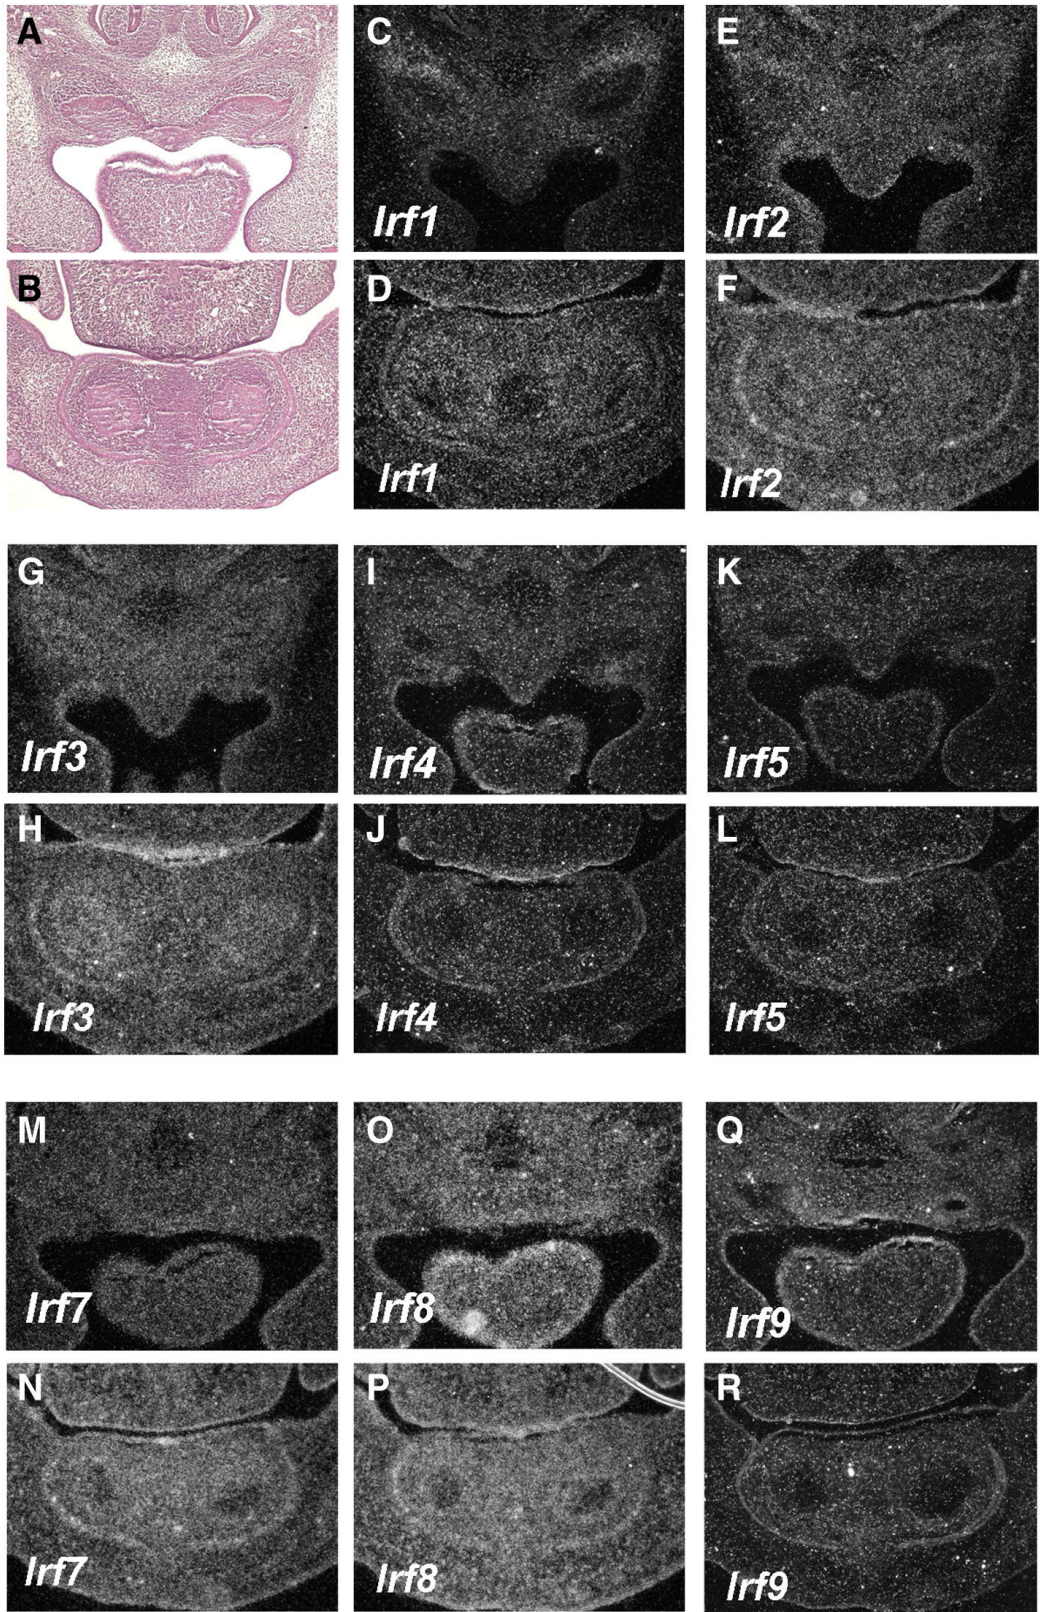

Supplementary Fig. 1. Expression of Irf family gene in tooth development. In situ hybridisation of Irf1 (C, D), Irf2 (E, F), Irf3 (G, H), Irf4 (I, J), Irf5 (K, L), Irf6 (M, N), Irf7 (O, P), Irf8 (Q, R) and Irf9 (S, T) on frontal head sections at E14.5. Upper (A, C, E, G, I, K, M, O, Q, S); lower (B, D, F, H, J, L, N, P, R, T) incisors.
