# Supplementary material
Source: PubMed Central journal article supplement (PMC7462630)
Supplement: NIHMS1617789-supplement-Supplemental_figure_2.pdf [file NIHMS1617789-supplement-Supplemental_figure_2.pdf]

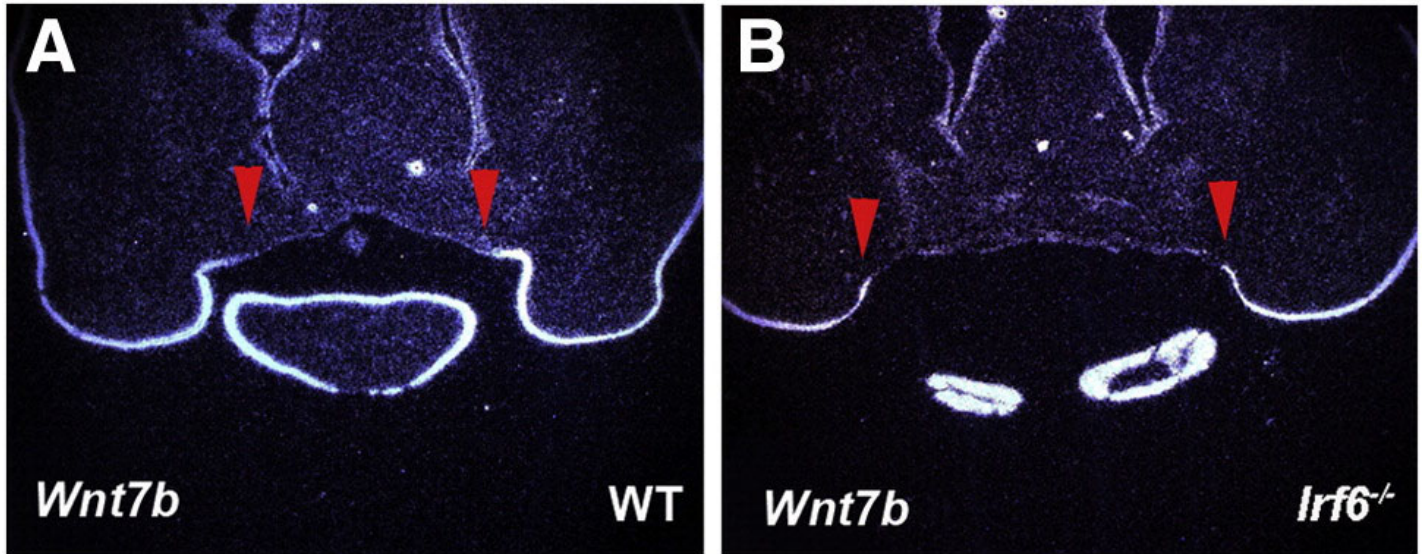

Supplementary Fig. 2. *Wnt7b* expression in incisor region. In situ hybridisation of *Wnt7b* on frontal head sections of wild-type (A) and *Irf6*<sup>-/-</sup> (B) at E13.5.
