# Supplementary material
Source: PubMed Central journal article supplement (PMC7462630)
Supplement: NIHMS1617789-supplement-Supplemental_figure_3.pdf [file NIHMS1617789-supplement-Supplemental_figure_3.pdf]

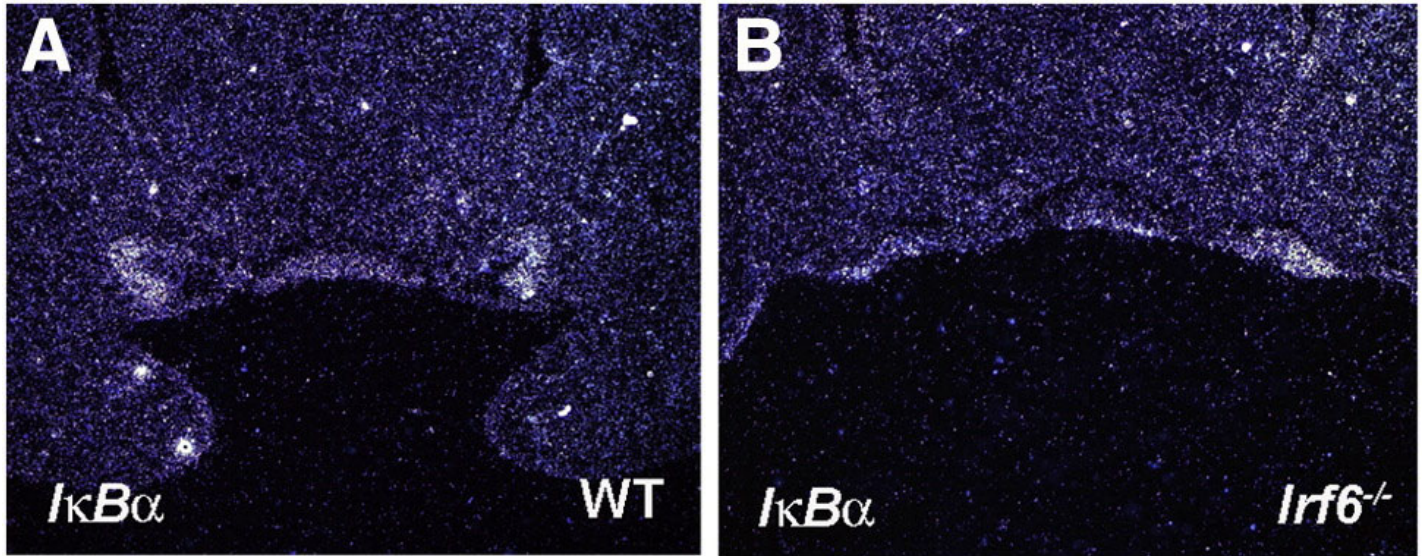

Supplementary Fig. 3.  $I\kappa B\alpha$  expression in incisor region. In situ hybridisation of  $I\kappa B\alpha$  on frontal head sections of wild-type (A) and  $Irf6^{-/-}$  (B) at E13.5.
