# Supplementary material
Source: PubMed Central journal article supplement (PMC7462630)
Supplement: NIHMS1617789-supplement-Supplemental_figure_4.pdf [file NIHMS1617789-supplement-Supplemental_figure_4.pdf]

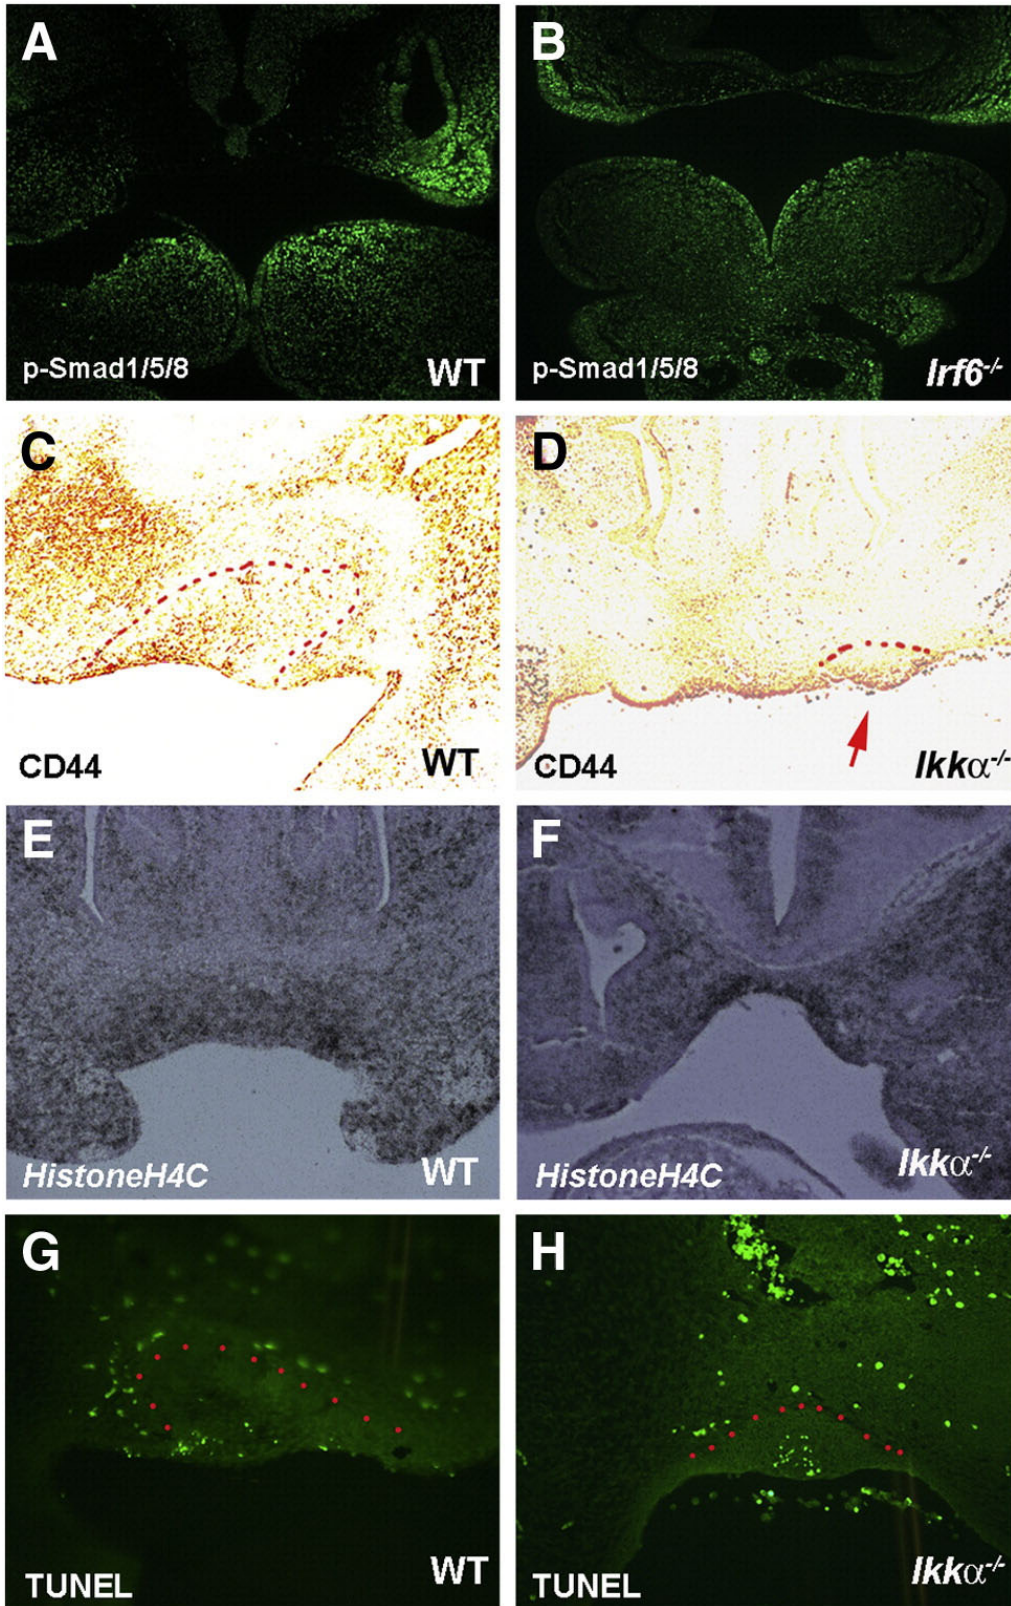

Supplementary Fig. 4. Molecular changes in evaginated epithelium at early stages of incisor tooth development. Immunohistochemistry of p-Smad1/5/8 (A, B) and CD44 (C, D), in situ hybridisation of HistoneH4C (E, F), and TUNEL assay (G, H) on frontal head sections at E10.5 (A, B), E11.5 (E, F) and E12.5 (C, D, G, H).
