# Supplementary material
Source: PubMed Central journal article supplement (PMC7462630)
Supplement: NIHMS1617789-supplement-Supplemental_figure_5.pdf [file NIHMS1617789-supplement-Supplemental_figure_5.pdf]

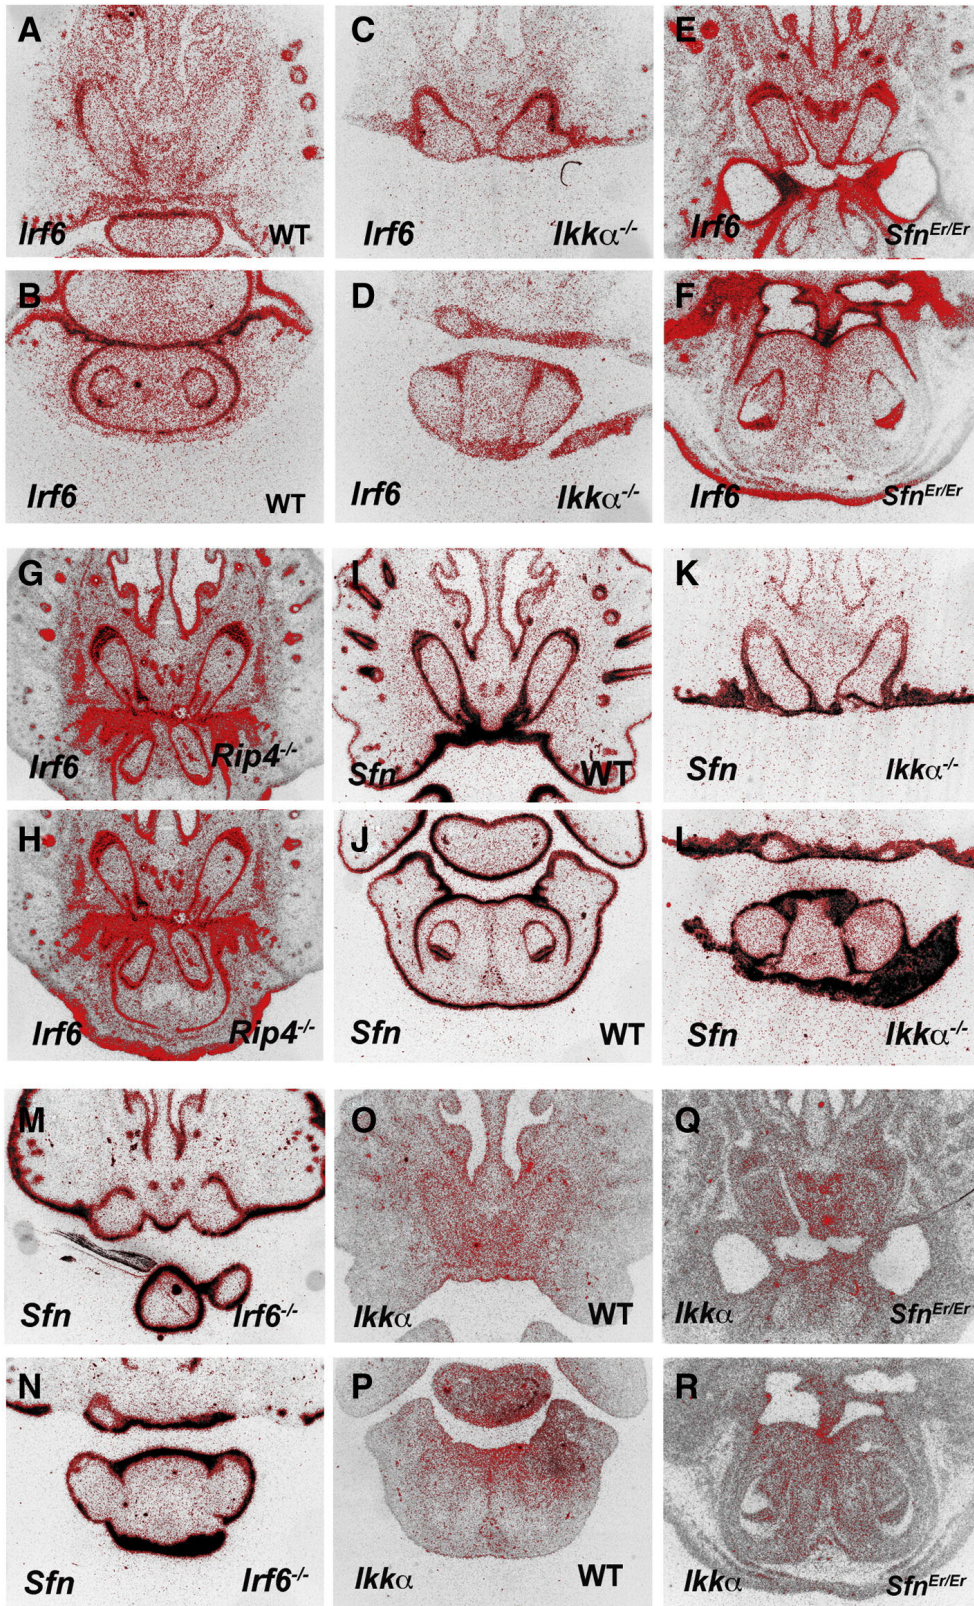

Supplementary Fig. 5. A cross-gene expression analysis at E17.5. In situ hybridisation of *Irf6* (A–H), *Sfn* (I–N) and *Ikka* (O–R) on frontal head sections of wild-type (A, B, I, J, O, P), *Irf6*<sup>-/-</sup> (C, D, M, N), *Ikka*<sup>-/-</sup> (C, D, K, L), *Rip4*<sup>-/-</sup> (G, H) and *Sfn*<sup>Er/Er</sup> (E, F, Q, R) at E17.5. Upper (A, C, E, G, I, K, M, O, Q) and lower (B, D, F, H, J, L, N, P, R) incisors.
