# Supplementary material
Source: PubMed Central journal article supplement (PMC7462630)
Supplement: NIHMS1617789-supplement-Supplemental_figure_6.pdf [file NIHMS1617789-supplement-Supplemental_figure_6.pdf]

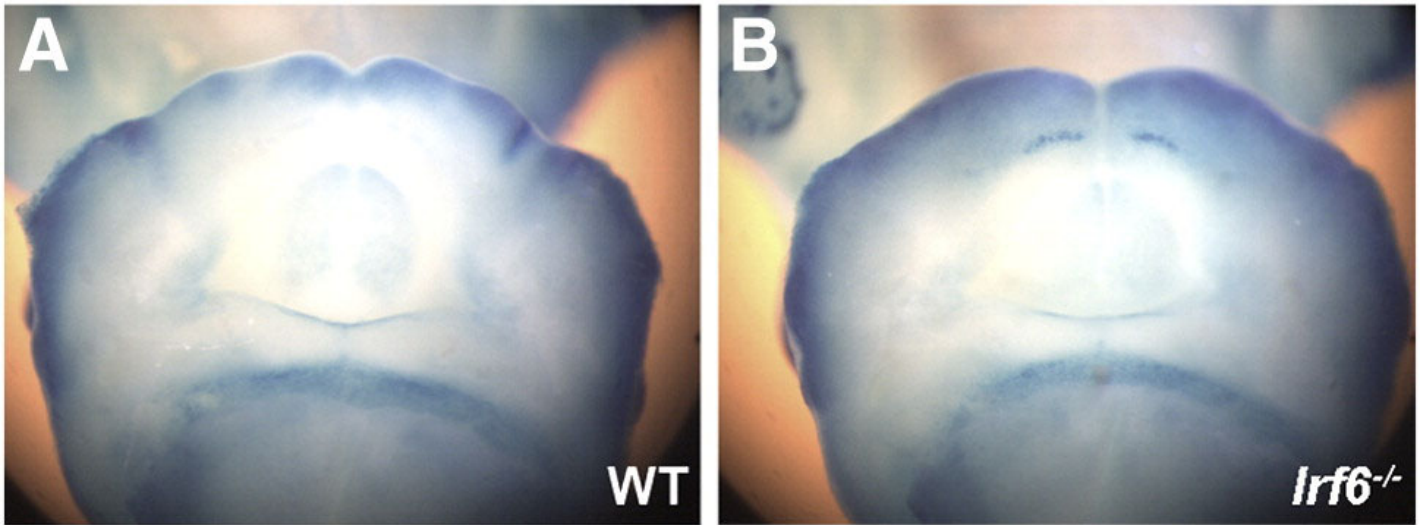

Supplementary Fig. 6. Wnt signaling in evaginated incisor tooth germs LacZ expression in *Axin2lacZ* (A) and *Irf6*<sup>-/-</sup>; *Axin2lacZ* (B) mice at E12.5.
